# Supplementary material
Source: Frontiers journal article supplement (https://www.frontiersin.org/articles/300825)
Supplement: Image_1.PDF [file Image_1.PDF]

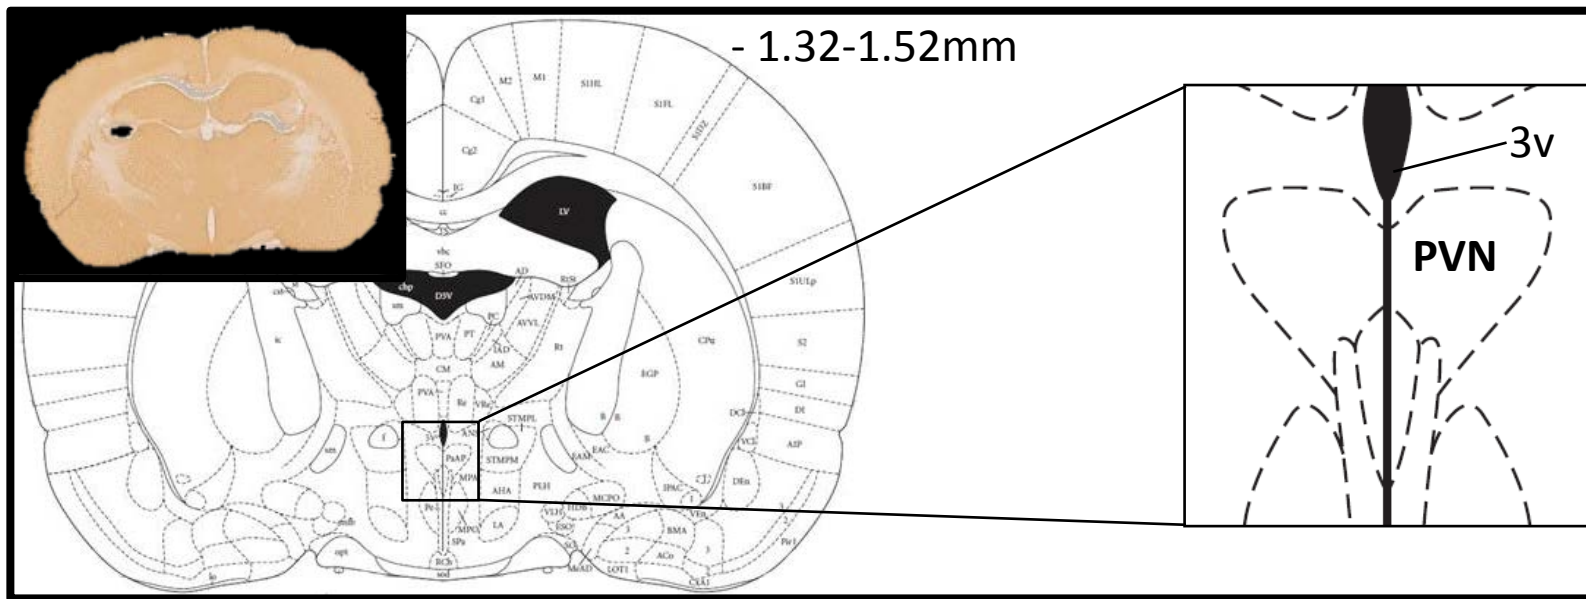

Supplementary figure IV



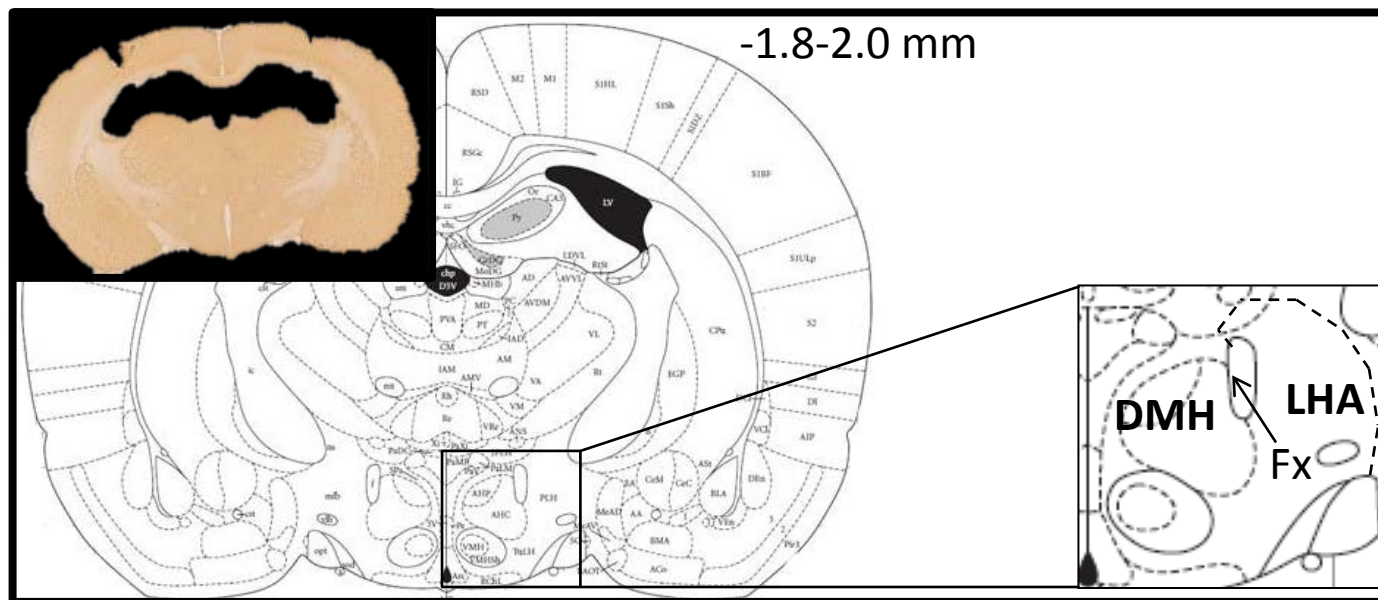

Supplementary figure VI

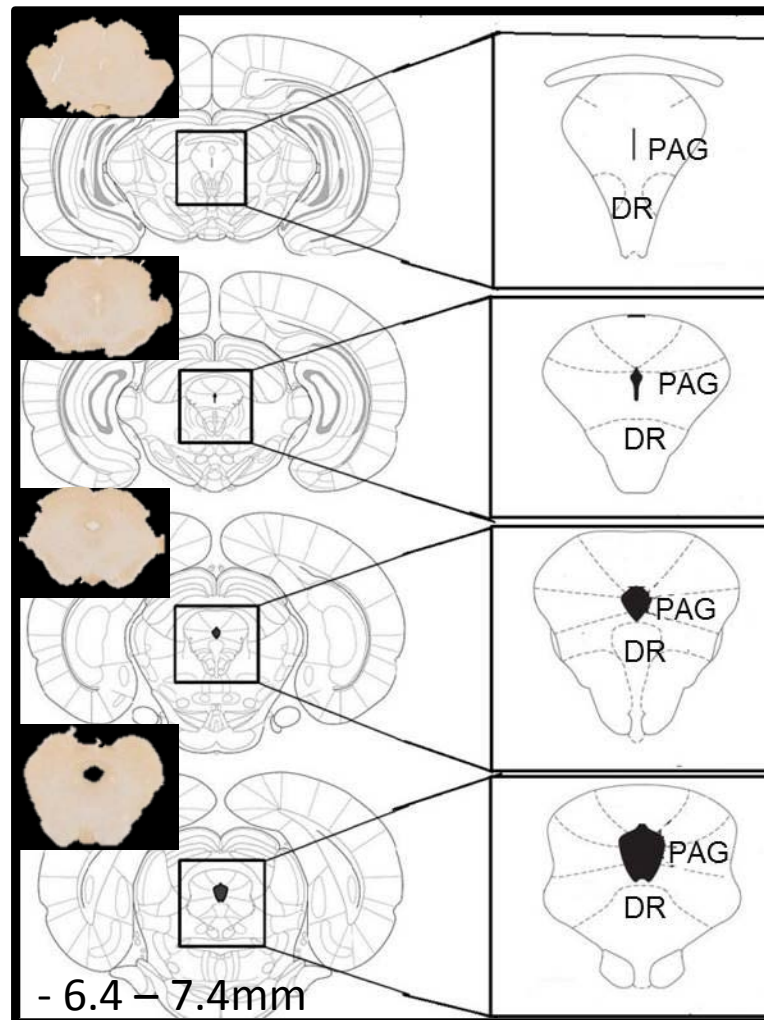

Supplementary figure VII

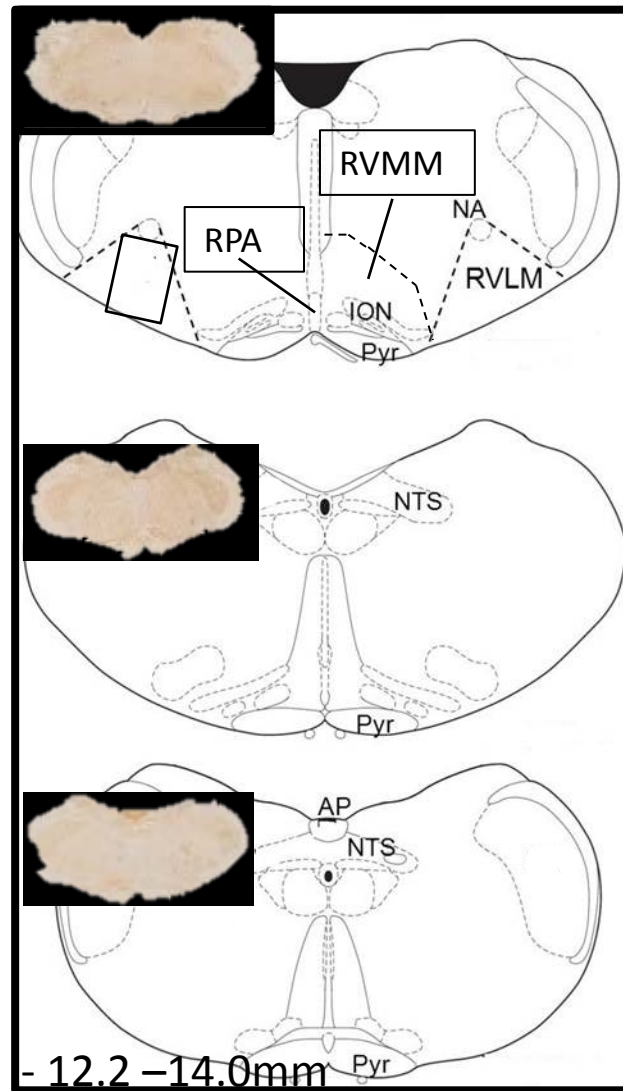

Supplementary figure VIII
